# Supplementary material for: Influence of Different Ratios of Lactobacillus delbrueckii subsp. bulgaricus and Streptococcus thermophilus on Fermentation Characteristics of Yogurt
Source: MDPI journal article supplement (doi:10.3390/molecules28052123), 2023-02-24
Supplement: s1 [file s1]

# Influence of Different Ratios of *Lactobacillus delbrueckii* subsp. *bulgaricus* and *Streptococcus thermophilus* on Fermentation Characteristics of Yogurt

Tong Dan <sup>1,2,3,\*</sup>, Haimin Hu <sup>1,2,3</sup>, Jiale Tian <sup>1,2,3</sup>, Binbin He <sup>1,2,3</sup>, Jiahui Tai <sup>1,2,3</sup> and Yanyan He <sup>1,2,3</sup>

<sup>1</sup> Key Laboratory of Dairy Biotechnology and Engineering, Ministry of Education, Department of Food Science and Engineering, Inner Mongolia Agricultural University, Hohhot 010018, China

<sup>2</sup> Key Laboratory of Dairy Products Processing, Ministry of Agriculture and Rural Affairs, Department of Food Science and Engineering, Inner Mongolia Agricultural University, Hohhot 010018, China

<sup>3</sup> Inner Mongolia Key Laboratory of Dairy Biotechnology and Engineering, Hohhot 010018, China

\* Correspondence: dantong813218@aliyun.com

**Table S1.** Volatile compounds produced in yogurts following fermentation by different ratios of *L. delbrueckii* subsp. *bulgaricus* IMAU20312 and *S. thermophilus* IMAU80809 in starter cultures compared with the commercial starter culture.

| No.              | Volatile compound           | Chemical formula                               | RI <sup>1</sup> | RI <sup>2</sup> | RT <sup>3</sup> (min) | µg/L  |       |       |       |       |       |
|------------------|-----------------------------|------------------------------------------------|-----------------|-----------------|-----------------------|-------|-------|-------|-------|-------|-------|
|                  |                             |                                                |                 |                 |                       | A1    | A2    | A3    | A4    | A5    | JD    |
| Carboxylic acids |                             |                                                |                 |                 |                       |       |       |       |       |       |       |
| 1                | Alanine                     | C <sub>3</sub> H <sub>7</sub> NO <sub>2</sub>  | -               | -               | 1.132                 | -     | 7.57  | 0.81  | -     | -     | 0.19  |
| 2                | D-Alanine                   | C <sub>3</sub> H <sub>7</sub> NO <sub>2</sub>  | -               | -               | 1.098                 | 6.90  | -     | 18.52 | -     | 9.93  | 4.15  |
| 3                | DL-Alanine, N-acetyl-       | C <sub>5</sub> H <sub>9</sub> NO <sub>3</sub>  | -               | -               | 1.785                 | 25.29 | -     | -     | 25.29 | 52.11 | -     |
| 4                | Acetic acid                 | C <sub>2</sub> H <sub>4</sub> O <sub>2</sub>   | 633.84          | 638             | 2.71                  | 1.80  | 0.57  | -     | -     | -     | 0.17  |
| 5                | Pyridinecarboxylic acid     | C <sub>6</sub> H <sub>5</sub> NO <sub>2</sub>  | 765             | nf              | 4.267                 | -     | 0.56  | -     | -     | -     | 0.16  |
| 6                | Propanedioic acid, propyl-  | C <sub>6</sub> H <sub>10</sub> O <sub>4</sub>  | 829.33          | nf              | 5.93                  | 0.62  | 2.65  | 0.58  | 1.82  | 4.89  | -     |
| 7                | Hexanoic acid               | C <sub>6</sub> H <sub>12</sub> O <sub>2</sub>  | 998.48          | 999             | 15.06                 | 2.95  | 11.32 | 2.97  | 12.10 | 8.54  | 1.69  |
| 8                | Heptanoic acid              | C <sub>7</sub> H <sub>14</sub> O <sub>2</sub>  | 1082            | 1080            | 16.387                | -     | 0.19  | -     | 23.83 | -     | -     |
| 9                | Cyclohexanecarboxylic acid  | C <sub>7</sub> H <sub>12</sub> O <sub>2</sub>  | 1130.56         | 1127.00         | 17.611                | 0.095 | 0.15  | -     | -     | -     | 0.14  |
| 10               | Octanoic acid, 7-oxo-       | C <sub>8</sub> H <sub>14</sub> O <sub>3</sub>  | 1109.03         | -               | 19.894                | -     | 0.28  | 0.12  | 2.05  | 0.16  | 0.03  |
| 11               | Octanoic acid               | C <sub>8</sub> H <sub>16</sub> O <sub>2</sub>  | 1189.21         | 1189            | 20.21                 | 2.94  | 1.33  | 0.24  | 12.10 | 8.53  | 1.69  |
| 12               | Nonanoic acid               | C <sub>9</sub> H <sub>18</sub> O <sub>2</sub>  | 1232            | 1226            | 22.138                | 0.16  | 0.16  | -     | 0.52  | -     | 0.072 |
| 13               | n-Decanoic acid             | C <sub>10</sub> H <sub>20</sub> O <sub>2</sub> | 1381.30         | 1387            | 24.779                | 0.34  | 0.12  | 0.36  | 1.86  | 1.14  | -     |
| 14               | Dodecanoic acid             | C <sub>12</sub> H <sub>24</sub> O <sub>2</sub> | 1608            | nf              | 30.109                | 0.13  | 0.14  | 0.09  | 0.94  | 0.15  | 0.03  |
| 15               | Dodecanoic acid, 3-hydroxy- | C <sub>12</sub> H <sub>24</sub> O <sub>3</sub> | 1651            | nf              | 30.123                | -     | 0.46  | -     | -     | -     | 0.78  |
| 16               | Tetradecanoic acid          | C <sub>14</sub> H <sub>28</sub> O <sub>2</sub> | -               | -               | 33.519                | 0.08  | 0.35  | 0.12  | 1.58  | 0.55  | 0.05  |
| 17               | n-Hexadecanoic acid         | C <sub>16</sub> H <sub>32</sub> O <sub>2</sub> | -               | -               | 35.956                | 0.14  | 1.04  | 0.22  | 0.36  | 1.03  | 0.25  |
| 18               | Oleic Acid                  | C <sub>18</sub> H <sub>34</sub> O <sub>2</sub> | -               | -               | 36                    | -     | 0.36  | -     | -     | 0.19  | -     |
| 19               | Propanoic acid, 2-oxo-      | C <sub>3</sub> H <sub>4</sub> O <sub>3</sub>   | 659             | nf              | 3.604                 | 0.49  | -     | -     | -     | -     | 0.16  |
| Aldehydes        |                             |                                                |                 |                 |                       |       |       |       |       |       |       |
| 1                | Acetaldehyde                | C <sub>2</sub> H <sub>4</sub> O                | -               | -               | 1.72                  | 5.94  | -     | 2.79  | 22.33 | -     | -     |
| 2                | Butanal, 3-hydroxy-         | C <sub>4</sub> H <sub>8</sub> O <sub>2</sub>   | 639             | nf              | 2.424                 | 2.34  | 0.43  | 0.40  | 3.88  | 5.83  | 0.11  |
| 3                | Butanal, 3-methyl-          | C <sub>5</sub> H <sub>10</sub> O               | 697.86          | 689             | 5.587                 | 0.96  | -     | -     | 0.96  | 1.02  | -     |
| 4                | Heptanal                    | C <sub>7</sub> H <sub>14</sub> O               | 913.65          | 907             | 10.84                 | 1.19  | -     | 1.19  | 0.79  | 0.71  | 0.73  |
| 5                | Benzaldehyde                | C <sub>7</sub> H <sub>6</sub> O                | 971.05          | 971             | 13.72                 | 2.40  | 0.61  | 0.12  | 1.28  | 1.30  | 0.33  |
| 6                | Nonanal                     | C <sub>9</sub> H <sub>18</sub> O               | 1118.78         | 1113            | 18.63                 | 0.21  | 0.49  | 0.25  | 2.02  | 1.22  | 0.19  |
| 7                | Decanal                     | C <sub>10</sub> H <sub>20</sub> O              | 1221            | 1219            | 21.68                 | -     | 0.28  | 0.15  | 1.21  | 0.71  | 0.09  |
| Ketones          |                             |                                                |                 |                 |                       |       |       |       |       |       |       |
| 1                | 2-Butanone, 3-methyl-       | C <sub>5</sub> H <sub>10</sub> O               | 665             | 666             | 1.863                 | 1.38  | -     | -     | 25.07 | 30.07 | 1.32  |
| 2                | 2,3-Butanedione             | C <sub>4</sub> H <sub>6</sub> O <sub>2</sub>   | -               | -               | 2.51                  | -     | 4.72  | 2.39  | -     | -     | 1.22  |
| 3                | 2-Pentanone                 | C <sub>5</sub> H <sub>10</sub> O               | 684.64          | 685             | 3.106                 | 0.39  | 1.27  | 0.62  | 5.98  | 5.43  | 0.24  |
| 4                | 2,3-Pentanedione            | C <sub>5</sub> H <sub>8</sub> O <sub>2</sub>   | 699             | 697             | 3.222                 | 0.55  | -     | 1.79  | 4.57  | 2.03  | 3.52  |

|                       |                                                                              |                                                |         |            |        |      |       |       |       |      |      |
|-----------------------|------------------------------------------------------------------------------|------------------------------------------------|---------|------------|--------|------|-------|-------|-------|------|------|
| 5                     | Acetoin                                                                      | C <sub>4</sub> H <sub>8</sub> O <sub>2</sub>   | 713     | 712        | 4.08   | 4.36 | 16.59 | 2.65  | 21.51 | 7.86 | 4.35 |
| 6                     | 2-Nonanone                                                                   | C <sub>9</sub> H <sub>18</sub> O               | 1106.15 | 1104       | 17.54  | 9.94 | 2.98  | 4.64  | 9.65  | 8.63 | 2.36 |
| 7                     | 2-Undecanone                                                                 | C <sub>11</sub> H <sub>22</sub> O              | 1310.42 | 1305       | 20.281 | 0.89 | 2.49  | 0.92  | 8.58  | 1.92 | 0.45 |
| 8                     | 2H-Pyran-2-one,<br>tetrahydro-6-pentyl-<br>2H-Pyran-2-one, 6-heptyltetrahydr | C <sub>10</sub> H <sub>18</sub> O <sub>2</sub> | 1512.66 | 1505       | 22.578 | -    | 1.09  | -     | 4.02  | 3.26 | 0.56 |
| 9                     | o-                                                                           | C <sub>12</sub> H <sub>22</sub> O <sub>2</sub> | 1054.34 | 1054       | 32.812 | 0.60 | 1.87  | 0.13  | 6.04  | 0.86 | 0.04 |
| Alcohols              |                                                                              |                                                |         |            |        |      |       |       |       |      |      |
| 1                     | 1-Butanol, 3-methyl-                                                         | C <sub>5</sub> H <sub>12</sub> O               | 733.79  | 734        | 4.789  | -    | 0.57  | -     | -     | 0.34 | -    |
| 2                     | 2-Hexanol, 3-methyl-                                                         | C <sub>7</sub> H <sub>16</sub> O               | 905     | 906        | 4.808  | -    | -     | -     | 8.93  | -    | -    |
| 3                     | 2-Pentenal, (E)-                                                             | C <sub>5</sub> H <sub>8</sub> O                | 766     | 765        | 5.388  | 0.22 | 0.22  | 0.14  | -     | -    | -    |
| 4                     | 1-Hexanol                                                                    | C <sub>6</sub> H <sub>14</sub> O               | 881.82  | 880        | 9.65   | 0.17 | 0.49  | 0.36  | 2.05  | 2.34 | 0.26 |
| 5                     | 1-Heptanol                                                                   | C <sub>7</sub> H <sub>16</sub> O               | 983.46  | 974        | 13.43  | 0.34 | 1.04  | 0.64  | 4.06  | 3.94 | -    |
| 6                     | 1-Nonanol                                                                    | C <sub>9</sub> H <sub>20</sub> O               | 1167.87 | 1171       | 19.265 | -    | -     | -     | 3.25  | 1.97 | 0.06 |
| 7                     | Cyclobutanol                                                                 | C <sub>4</sub> H <sub>8</sub> O                | 1181.18 | nf         | 19.83  | -    | -     | 3.78  | -     | -    | -    |
| 8                     | 2-Nonanol                                                                    | C <sub>9</sub> H <sub>20</sub> O               | 1107    | 1108.7     | 17.56  | 0.82 | -     | -     | -     | -    | -    |
| 9                     | 1-Octanol, 2-butyl-                                                          | C <sub>12</sub> H <sub>26</sub> O              | 1279.00 | 1277(DB-5) | 28.546 | -    | 0.11  | 0.09  | 1.31  | -    | 0.05 |
| Esters                |                                                                              |                                                |         |            |        |      |       |       |       |      |      |
| 1                     | Formic acid, ethenyl ester                                                   | C <sub>3</sub> H <sub>4</sub> O <sub>2</sub>   | -       | -          | 2.45   | -    | -     | 12.66 | -     | -    | -    |
| 2                     | Hexanoic acid, ethyl ester                                                   | C <sub>8</sub> H <sub>16</sub> O <sub>2</sub>  | 1013.73 | 1014       | 9.56   | 0.09 | 0.20  | 0.14  | 0.67  | 0.69 | 0.09 |
| 3                     | Octanoic acid, ethyl ester                                                   | C <sub>10</sub> H <sub>20</sub> O <sub>2</sub> | -       | -          | 10.16  | -    | -     | 0.22  | -     | -    | 0.55 |
| 4                     | Acetic acid, 3,7,11,15-tetramethyl-hexadecyl ester                           | C <sub>22</sub> H <sub>44</sub> O <sub>2</sub> | -       | -          | 33.896 | 0.64 | 0.64  | -     | 1.90  | 0.42 | -    |
| Aromatic hydrocarbons |                                                                              |                                                |         |            |        |      |       |       |       |      |      |
| 1                     | Ethylene oxide                                                               | C <sub>2</sub> H <sub>4</sub> O                | -       | -          | 1.103  | -    | 8.20  | -     | -     | -    | 0.72 |
| 2                     | 1,3,5-Cycloheptatriene                                                       | C <sub>7</sub> H <sub>8</sub>                  | 761     | 765        | 4.639  | 0.17 | 0.39  | 0.46  | 0.38  | 1.92 | -    |
| 3                     | Butane, 1-chloro-3-methyl-                                                   | C <sub>5</sub> H <sub>11</sub> Cl              | 754     | nf         | 4.716  | 0.10 | -     | 0.33  | -     | 3.03 | 0.20 |
| 4                     | o-Xylene                                                                     | C <sub>8</sub> H <sub>10</sub>                 | 901     | 902        | 8.566  | 0.19 | 0.19  | 0.14  | 0.21  | -    | 0.04 |
| 5                     | 1,3,5,7-Cyclooctatetraene                                                    | C <sub>8</sub> H <sub>8</sub>                  | 752     | 758        | 9.393  | -    | 0.49  | 0.34  | -     | 0.39 | 0.11 |
| 6                     | Oxime-, methoxy-phenyl-                                                      | C <sub>8</sub> H <sub>9</sub> NO <sub>2</sub>  | 926.73  | -          | 10.753 | 0.33 | 0.40  | 0.10  | 1.99  | 3.62 | 2.40 |
| 7                     | (+)-4-Carene                                                                 | C <sub>10</sub> H <sub>16</sub>                | 944.21  | 943        | 11.043 | -    | 0.20  | 0.07  | 1.36  | -    | 0.14 |
| 8                     | Pentane, 1-chloro-                                                           | C <sub>5</sub> H <sub>11</sub> Cl              | 751     | nf         | 4.803  | -    | 0.29  | -     | 0.98  | -    | -    |
| 9                     | p-Xylene                                                                     | C <sub>8</sub> H <sub>10</sub>                 | 878.32  | 876        | 8.494  | 0.12 | 0.24  | -     | -     | -    | -    |
| 10                    | 1-Nonyne                                                                     | C <sub>9</sub> H <sub>16</sub>                 | 1139    | nf         | 16.087 | 0.27 | 0.79  | 0.45  | 2.61  | 0.60 | 0.30 |
| 11                    | Tetradecane                                                                  | C <sub>14</sub> H <sub>30</sub>                | 1439.74 | nf         | 25.644 | 0.06 | 0.04  | 0.09  | 1.30  | 0.13 | 0.03 |

|    |                                      |                                   |         |                    |        |      |      |      |       |      |      |
|----|--------------------------------------|-----------------------------------|---------|--------------------|--------|------|------|------|-------|------|------|
| 12 | Octadecane, 6-methyl-                | C <sub>19</sub> H <sub>40</sub>   | 1739.25 | 1842<br>(Squalane) | 28.546 | 0.16 | 0.16 | -    | -     | -    | 0.12 |
| 13 | Pentadecane                          | C <sub>15</sub> H <sub>32</sub>   | 1296.47 | -                  | 28.537 | -    | -    | 0.13 | 0.26  | -    | -    |
| 14 | Octane, 2,7-dimethyl-                | C <sub>10</sub> H <sub>22</sub>   | 28.546  | 933.18             | 9.34   | 0.09 | -    | -    | -     | -    | 0.15 |
| 15 | 2-Propanamine                        | C <sub>3</sub> H <sub>9</sub> N   | -       | -                  | 1.56   | -    | 6.95 | -    | 31.58 | -    | 2.14 |
| 16 | Oxetane, 2-methyl-4-propyl-Butylated | C <sub>7</sub> H <sub>14</sub> O  | -       | -                  | 19.9   | -    | -    | -    | 0.18  | -    | -    |
| 15 | Hydroxytoluene                       | C <sub>15</sub> H <sub>24</sub> O | 1566.61 | 1533.3             | 28.958 | -    | -    | 0.05 | 1.52  | 0.15 | -    |

<sup>1</sup>RI, retention index. The RI of unknown compounds calculated against the GC-MS retention time of n-alkanes (C3-C25); <sup>2</sup>RI from a database (<http://webbook.nist.gov/chemistry>); <sup>3</sup>RT, retention time; nf, the corresponding reference retention index is not found in this database; '-', not detected. Five different ratios of *L. delbrueckii* subsp. *bulgaricus* IMAU20312 and *S. thermophilus* IMAU80809 were used as mixed-starter cultures: A1 =1:1, A2 = 1:10, A3=1:100, A4=1:1000, A5=1:2000, A = JD (commercial yogurt starter culture as a control).
